# Supplementary material for: Urbanisation and land-cover change affect functional, but not compositional turnover of bird communities
Source: Springer Nature journal article supplement (doi:10.1007/s11252-022-01258-z), 2022-06-22
Supplement: MOESM1 [file 23197204]

# **Supplementary material**

**Table S.1** Description of land-cover categories. Descriptions and classifications based on Ahlstrøm et al. (2014).

| Land-cover category | Description |
| --- | --- |
| Developed area | Buildings, roads/traffic and communication |
| Coniferous forest | Coniferous forest |
| Deciduous forest | Deciduous forest |
| Mixed forest | Mixed forest |
| Cultivated land | Fully- and superficially cultivated soil and -organic soil |
| Grassland | Home fields grazing land; areas which can be used for grazing, but cannot be harvested mechanically. |
| Open | All open areas, both natural and anthropogenic, which do not fit into other defined categories. |
| Water | Freshwater and sea. |
| Mire | Mire, both open and including tree cover; tree cover too sparse to be classified as forest. |


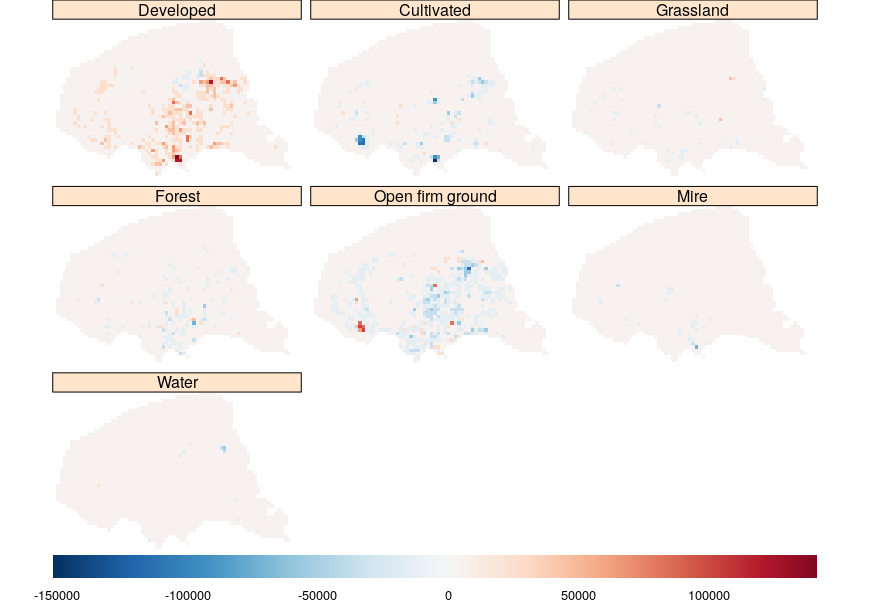


**Figure S.1** Changes in area (m2) of individual land-cover classifications. Darker colours indicate greater numerical values, red hues indicate increasing area, and blue hues indicate decreasing area.

**Table S.2** Species included in the analyses and their respective trait values. Trait values of the individual species were obtained from Billerman et al. (2020, Myhrvold et al. (2015, Wilman et al. (2014) and Norsk Ornitologisk Forening (Birdlife Norway) (2020). Superscript after the species name indicates conservation status in Norway: NT = Near threatened, VU = Vulnerable, EN = Endangered, SE = Severe impact (alien species). Species of “Least concern” are not indicated.

| **Species** | **Habitat** | **Main dietary component** | **Forage stratum** | **Adult body mass (g)** | **Longevity (years** |
| --- | --- | --- | --- | --- | --- |
| Acanthis cabaret | Woodland | NA | NA | NA | NA |
| Acanthis flammea | Open woodland | Plant/seed | Ground | 13.00 | 10.67 |
| Acanthis hornemanni | Open woodland | Plant/seed | Understorey | 14.30 | 4.60 |
| Accipiter gentilis NT | Woodland | Vertebrates/scavenging | Ground | 988.75 | 17.71 |
| Accipiter nisus | Open woodland | Vertebrates/scavenging | Aerial | 212.00 | 17.89 |
| Actitis hypoleucos | Water | Omnivore | Water (around surface) | 48.00 | 14.50 |
| Aegithalos caudatus | Woodland | Invertebrate | Understorey | 8.60 | 10.80 |
| Alauda arvensis VU | Open | Plant/seed | Ground | 37.50 | 10.00 |
| Alca torda EN | Marine | Vertebrates/scavenging | Water (below surface) | 720.00 | 18.00 |
| Alle alle | Marine | Invertebrate | Water (below surface) | 160.00 | 16.00 |
| Anas acuta VU | Water | Plant/seed | Water (around surface) | 872.25 | 26.95 |
| Anas crecca | Water | Plant/seed | Water (around surface) | 343.80 | 21.00 |
| Anas penelope | Water | Plant/seed | Water (around surface) | 757.00 | 18.25 |
| Anas platyrhynchos | Water | Omnivore | Water (around surface) | 1 121.00 | 29.00 |
| Anser anser | Water | Plant/seed | Ground | 3 308.50 | 26.00 |
| Anser brachyrhynchus | Water | Plant/seed | Water (around surface) | 2 707.50 | 25.58 |
| Anthus petrosus | Water | Invertebrate | Ground | 22.40 | 9.91 |
| Anthus pratensis | Open | Invertebrate | Ground | 18.65 | 7.73 |
| Anthus trivialis | Open woodland | Invertebrate | Ground | 23.40 | 8.18 |
| Apus apus | Open | Invertebrate | Aerial | 39.00 | 21.00 |
| Ardea cinerea | Water | Vertebrates/scavenging | Water (around surface) | 1 443.00 | 30.25 |
| Aythya fuligula | Water | Omnivore | Water (below surface) | 701.50 | 22.00 |
| Aythya marila VU | Water | Invertebrate | Water (below surface) | 959.00 | 19.38 |
| Bombycilla garrulus | Open woodland | Omnivore | Understorey | 54.45 | 5.83 |
| Branta canadensis SE | Water | Plant/seed | Water (around surface) | 3 984.50 | 27.42 |
| Bucephala clangula | Water | Invertebrate | Water (below surface) | 895.93 | 16.92 |
| Buteo lagopus | Open | Vertebrates/scavenging | Ground | 945.50 | 17.90 |
| Calidris alpina | Water | Invertebrate | Ground | 54.60 | 19.75 |
| Calidris maritima | Water | Invertebrate | Ground | 69.48 | 20.35 |
| Carduelis carduelis | Open woodland | Plant/seed | Understorey | 16.00 | 14.08 |
| Cepphus grylle VU | Marine | Vertebrates/scavenging | Water (below surface) | 390.50 | 22.95 |
| Certhia familiaris | Woodland | Invertebrate | Ground | 9.10 | 7.43 |
| Charadrius hiaticula | Water | Invertebrate | Ground | 64.10 | 20.36 |
| Chloris chloris | Open woodland | Plant/seed | Ground | 27.65 | 13.00 |
| Chroicocephalus ridibundus VU | Water | Invertebrate | Water (around surface) | 271.67 | 31.33 |
| Cinclus cinclus | Water | Invertebrate | Water (below surface) | 61.70 | 10.58 |
| Clangula hyemalis NT | Water | Invertebrate | Water (below surface) | 814.00 | 15.60 |
| Coccothraustes coccothraustes | Woodland | Plant/seed | Midhigh | 56.05 | 12.58 |
| Coloeus monedula | Open | Omnivore | Ground | 246.00 | 14.50 |
| Columba livia | Urban | Plant/seed | Ground | 320.00 | 21.54 |
| Columba palumbus | Woodland | Plant/seed | Ground | 490.00 | 16.33 |
| Corvus corax | Generalist | Vertebrates/scavenging | Ground | 1 097.00 | 21.83 |
| Corvus cornix | Open | Vertebrates/scavenging | Ground | 544.50 | 16.80 |
| Corvus frugilegus NT | Open | Omnivore | Ground | 453.50 | 19.92 |
| Cuculus canorus NT | Woodland | Invertebrate | Midhigh | 111.50 | 12.91 |
| Cyanistes caeruleus | Woodland | Omnivore | Midhigh | 11.20 | 13.08 |
| Cygnus cygnus | Water | Plant/seed | Water (around surface) | 9 413.00 | 25.17 |
| Delichon urbicum NT | Open | Invertebrate | Canopy | 16.78 | 14.50 |
| Dendrocopos major | Woodland | Omnivore | Midhigh | 76.50 | 12.68 |
| Dendrocopos minor | Woodland | Invertebrate | Canopy | 20.00 | 9.80 |
| Dryocopus martius | Woodland | Invertebrate | Ground | 321.00 | 14.00 |
| Emberiza citrinella NT | Open woodland | Plant/seed | Ground | 29.70 | 13.00 |
| Emberiza schoeniclus NT | Scrub | Plant/seed | Ground | 18.80 | 11.23 |
| Erithacus rubecula | Woodland | Omnivore | Ground | 17.55 | 17.20 |
| Falco columbarius | Generalist | Vertebrates/scavenging | Midhigh | 187.58 | 12.50 |
| Falco peregrinus | Generalist | Vertebrates/scavenging | Aerial | 827.25 | 17.34 |
| Falco tinnunculus | Open | Vertebrates/scavenging | Ground | 204.75 | 20.42 |
| Ficedula hypoleuca | Woodland | Invertebrate | Midhigh | 12.78 | 10.92 |
| Fringilla coelebs | Woodland | Invertebrate | Ground | 22.63 | 29.00 |
| Fringilla montifringilla | Woodland | Omnivore | Ground | 22.93 | 14.75 |
| Gallinago gallinago | Water | Invertebrate | Ground | 113.00 | 12.33 |
| Garrulus glandarius | Woodland | Omnivore | Ground | 160.85 | 17.00 |
| Gavia arctica | Water | Vertebrates/scavenging | Water (around surface) | 2 665.00 | 28.00 |
| Gavia stellata | Water | Vertebrates/scavenging | Water (around surface) | 1 603.00 | 23.58 |
| Glaucidium passerinum | Open woodland | Vertebrates/scavenging | Ground | 65.50 | 6.00 |
| Grus grus | Water | Plant/seed | Water (around surface) | 5 500.00 | 39.40 |
| Haematopus ostralegus | Water | Invertebrate | Water (around surface) | 526.00 | 36.00 |
| Haliaeetus albicilla | Water | Vertebrates/scavenging | Water (around surface) | 4 793.00 | 29.83 |
| Hippolais icterina | Woodland | Invertebrate | Canopy | 13.20 | 10.80 |
| Hirundo rustica | Open | Invertebrate | Midhigh | 19.00 | 13.50 |
| Lanius excubitor | Open | Vertebrates/scavenging | Ground | 63.98 | 7.33 |
| Larus argentatus | Water | Vertebrates/scavenging | Water (around surface) | 1 085.00 | 33.42 |
| Larus canus NT | Generalist | Omnivore | Water (around surface) | 415.75 | 27.92 |
| Larus fuscus | Marine | Vertebrates/scavenging | Water (below surface) | 1 010.25 | 32.75 |
| Larus glaucoides | Marine | Vertebrates/scavenging | Water (around surface) | 863.00 | 33.00 |
| Larus marinus | Marine | Omnivore | Ground | 1 658.50 | 25.75 |
| Linaria flavirostris NT | Open | Plant/seed | Ground | 15.40 | 6.08 |
| Lophophanes cristatus | Woodland | Invertebrate | Canopy | 11.08 | 11.58 |
| Loxia curvirostra | Woodland | Plant/seed | Midhigh | 39.50 | 8.00 |
| Loxia leucoptera | Woodland | Plant/seed | Midhigh | 29.80 | 4.00 |
| Loxia pytyopsittacus | Woodland | Plant/seed | Understorey | 53.25 | 6.00 |
| Luscinia svecica NT | Open | Invertebrate | Ground | 17.30 | 11.40 |
| Lyrurus tetrix | Open | Plant/seed | Ground | 1 084.75 | 12.23 |
| Melanitta fusca VU | Water | Invertebrate | Water (below surface) | 1 732.00 | 15.60 |
| Melanitta nigra NT | Water | Invertebrate | Water (below surface) | 1 052.20 | 16.78 |
| Mergus merganser | Water | Vertebrates/scavenging | Water (below surface) | 1 462.50 | 13.80 |
| Mergus serrator | Water | Vertebrates/scavenging | Water (below surface) | 1 042.58 | 9.33 |
| Motacilla alba | Open | Invertebrate | Ground | 24.10 | 12.25 |
| Motacilla cinerea | Water | Invertebrate | Ground | 17.20 | 8.00 |
| Motacilla flava | Wetland | Invertebrate | Ground | 17.58 | 8.82 |
| Nucifraga caryocatactes | Woodland | Plant/seed | Ground | 183.00 | 16.08 |
| Numenius arquata VU | Wetland | Omnivore | Ground | 735.00 | 31.50 |
| Numenius phaeopus | Open | Invertebrate | Ground | 383.00 | 12.50 |
| Oenanthe oenanthe | Open | Invertebrate | Ground | 23.78 | 9.60 |
| Parus major | Open woodland | Omnivore | Midhigh | 18.00 | 15.20 |
| Passer domesticus | Urban | Plant/seed | Ground | 27.70 | 17.71 |
| Passer montanus | Open | Plant/seed | Midhigh | 22.05 | 11.58 |
| Periparus ater | Woodland | Omnivore | Ground | 9.28 | 9.42 |
| Perisoreus infaustus | Woodland | Omnivore | Ground | 84.50 | 15.62 |
| Phalacrocorax carbo | Water | Vertebrates/scavenging | Water (below surface) | 2 200.00 | 21.63 |
| Philomachus pugnax EN | Wetland | Omnivore | Ground | 140.25 | 13.90 |
| Phoenicurus phoenicurus | Open woodland | Invertebrate | Understorey | 14.85 | 10.20 |
| Phylloscopus collybita | Woodland | Invertebrate | Midhigh | 8.30 | 7.80 |
| Phylloscopus trochilus | Woodland | Invertebrate | Canopy | 8.85 | 10.83 |
| Pica pica | Open | Vertebrates/scavenging | Ground | 213.38 | 10.49 |
| Picoides tridactylus | Woodland | Invertebrate | Understorey | 65.65 | 8.75 |
| Picus canus | Open woodland | Invertebrate | Ground | 137.00 | 7.67 |
| Picus viridis | Open | Invertebrate | Ground | 184.67 | 15.08 |
| Pinicola enucleator | Woodland | Plant/seed | Midhigh | 57.00 | 9.73 |
| Plectrophenax nivalis | Open | Plant/seed | Ground | 40.33 | 8.80 |
| Pluvialis apricaria | Open | Invertebrate | Ground | 213.25 | 12.75 |
| Podiceps auritus VU | Water | Vertebrates/scavenging | Water (below surface) | 420.58 | 6.46 |
| Podiceps grisegena | Water | Omnivore | Water (below surface) | 946.50 | 4.80 |
| Poecile montanus | Woodland | Invertebrate | Midhigh | 11.20 | 11.30 |
| Poecile palustris | Woodland | Omnivore | Midhigh | 11.35 | 11.90 |
| Prunella modularis | Woodland | Omnivore | Ground | 20.20 | 10.35 |
| Pyrrhula pyrrhula | Woodland | Plant/seed | Understorey | 25.70 | 17.50 |
| Regulus regulus | Woodland | Invertebrate | Understorey | 5.60 | 7.00 |
| Riparia riparia NT | Wetland | Invertebrate | Midhigh | 13.40 | 8.00 |
| Saxicola rubetra | Open | Invertebrate | Ground | 16.60 | 6.06 |
| Scolopax rusticola | Woodland | Invertebrate | Ground | 309.50 | 15.50 |
| Setophaga striata | Woodland | Invertebrate | Midhigh | 12.39 | 5.00 |
| Sitta europaea | Woodland | Invertebrate | Midhigh | 22.40 | 12.87 |
| Somateria mollissima NT | Marine | Invertebrate | Water (below surface) | 2 092.00 | 23.00 |
| Spinus spinus | Open woodland | Plant/seed | Understorey | 13.50 | 13.50 |
| Stercorarius longicaudus | Marine | Vertebrates/scavenging | Ground | 298.00 | 11.00 |
| Stercorarius parasiticus NT | Marine | Vertebrates/scavenging | Ground | 450.00 | 24.58 |
| Sterna hirundo EN | Water | Vertebrates/scavenging | Water (below surface) | 124.00 | 33.00 |
| Sterna paradisaea | Water | Vertebrates/scavenging | Water (around surface) | 110.00 | 34.00 |
| Streptopelia decaocto NT | Urban | Plant/seed | Ground | 154.70 | 17.67 |
| Strix aluco | Open woodland | Vertebrates/scavenging | Ground | 496.50 | 21.50 |
| Sturnus vulgaris NT | Open | Omnivore | Ground | 77.68 | 20.69 |
| Sylvia atricapilla | Woodland | Omnivore | Midhigh | 18.33 | 9.80 |
| Sylvia borin | Woodland | Omnivore | Understorey | 19.55 | 19.08 |
| Sylvia communis | Open | Invertebrate | Understorey | 15.50 | 7.50 |
| Sylvia curruca | Open | Invertebrate | Midhigh | 12.04 | 7.59 |
| Tachybaptus ruficollis VU | Water | Invertebrate | Water (below surface) | 174.00 | 13.08 |
| Tadorna tadorna | Water | Invertebrate | Water (around surface) | 1 094.00 | 24.75 |
| Tetrao urogallus | Woodland | Plant/seed | Ground | 2 942.50 | 18.00 |
| Tetrastes bonasia | Woodland | Plant/seed | Ground | 406.75 | 7.25 |
| Tringa nebularia | Water | Invertebrate | Water (around surface) | 175.50 | 24.41 |
| Tringa ochropus | Woodland | Invertebrate | Water (around surface) | 79.25 | 11.50 |
| Tringa totanus | Water | Invertebrate | Water (around surface) | 129.00 | 23.62 |
| Troglodytes troglodytes | Woodland | Invertebrate | Ground | 9.23 | 5.83 |
| Turdus iliacus | Open woodland | Omnivore | Ground | 62.08 | 18.78 |
| Turdus merula | Generalist | Omnivore | Ground | 102.00 | 21.07 |
| Turdus philomelos | Woodland | Omnivore | Ground | 68.80 | 17.54 |
| Turdus pilaris | Open woodland | Invertebrate | Ground | 104.78 | 18.04 |
| Turdus torquatus | Open woodland | Omnivore | Understorey | 109.00 | 9.08 |
| Turdus viscivorus | Open woodland | Omnivore | Ground | 117.50 | 16.77 |
| Vanellus vanellus EN | Open | Invertebrate | Ground | 218.00 | 23.60 |


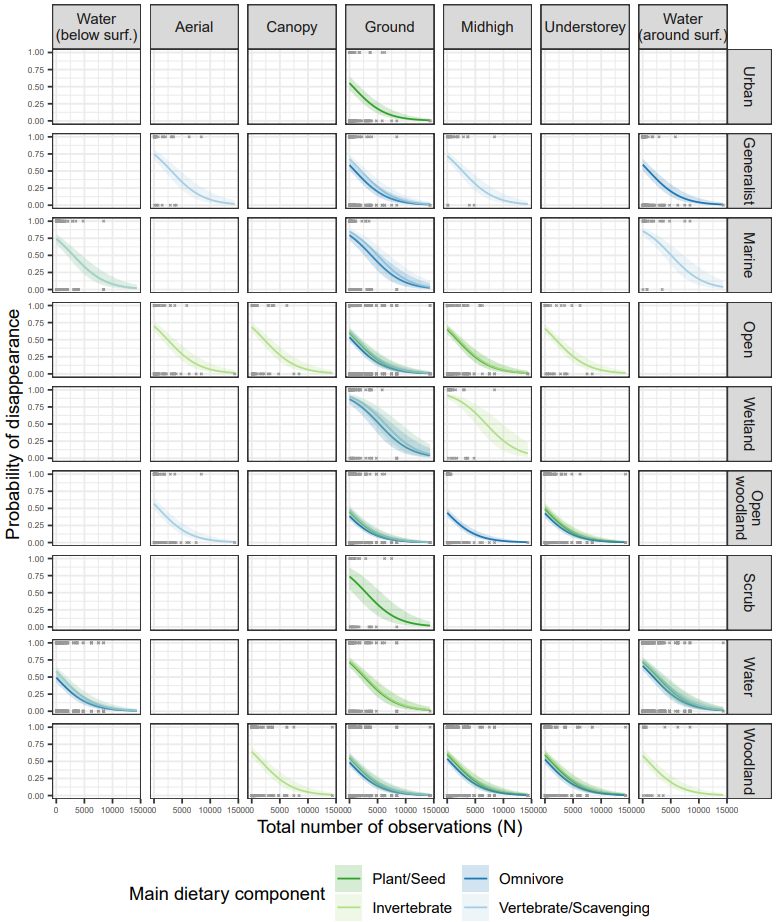


**Figure S.2** Response curves for the predicted probabilities of species disappearance. Predicted probabilities of species disappearance as a function of the total number of sampling events in the study period. Different colours indicate different main dietary components. Facets indicate different forage strata and habitat associations. Ribbons indicate 0.95 confidence intervals around the predictions. Longevity was held constant at 15 years, difference in sampling effort was fixed at zero, and change in Developed area was fixed at the mean area of change observed in the analysed grid cells: 11 964.2 m2. Spatial effects were removed.


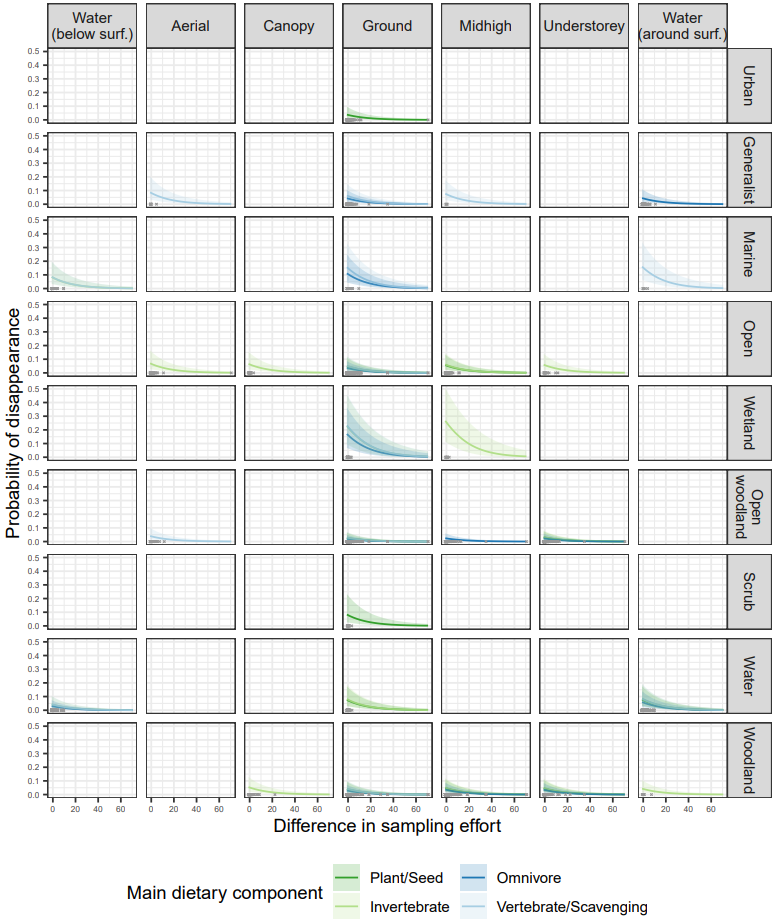


**Figure S.3** Response curves for the predicted probabilities of species disappearance. Predicted probabilities of species disappearance as a function of the difference in sampling effort between the two time periods. Different colours indicate different main dietary components. Facets indicate different forage strata and habitat associations. Ribbons indicate 0.95 confidence intervals around the predictions. Longevity was held constant at 15 years, the total no. sampling events was fixed at 10 000, and change in Developed area was fixed at the mean area of change observed in the analysed grid cells: 11 964.2 m2. Spatial effects were removed.


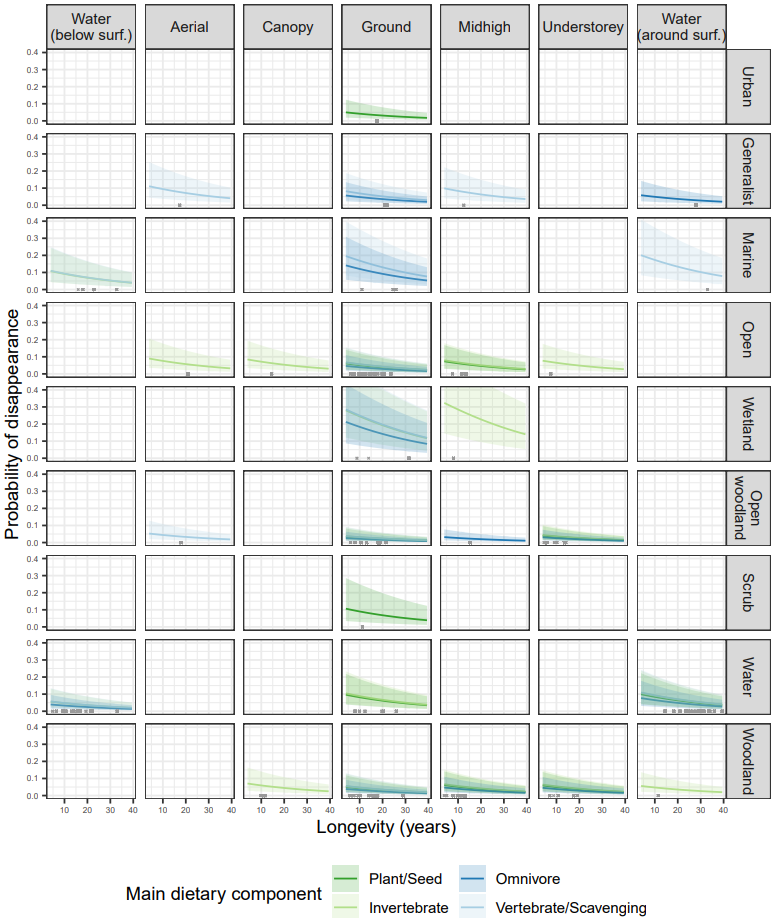


**Figure S.4** Response curves for the predicted probabilities of species disappearance. Predicted probabilities of species disappearance as a function of longevity. The facets indicate the differences between forage strata and habitat associations. Different colours indicate differences in main dietary components. Ribbons indicate 0.95 confidence intervals around the predictions. Total no. sampling events was fixed at 10 000, difference in sampling effort was fixed at zero, and change in Developed area was fixed at the mean area of change observed in the analysed grid cells: 11 964.2 m2. Spatial effects were removed.


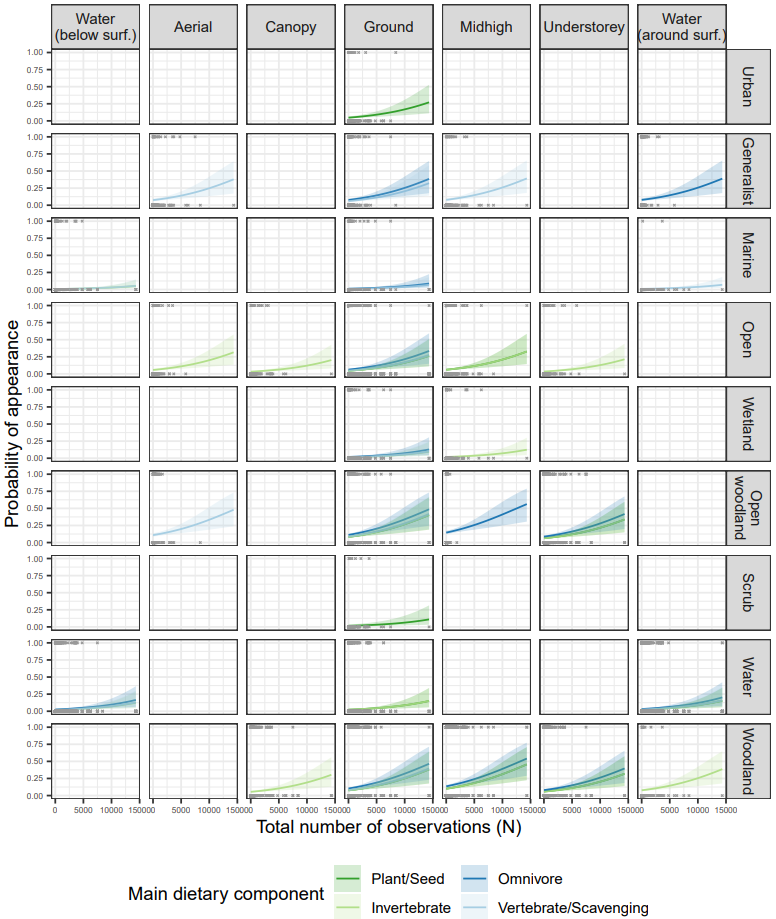


**Figure S.5** Response curves for the predicted probabilities of species appearance. Predicted probabilities of species appearance as a function of the total number of sampling events in the study period. Different colours indicate different main dietary components. Facets indicate different forage strata and habitat associations. Ribbons indicate 0.95 confidence intervals around the predictions. Longevity was held constant at 15 years, difference in sampling effort was fixed at zero, and change in Developed area was fixed at the mean area of change observed in the analysed grid cells: 11 964.2 m2. Spatial effects were removed.


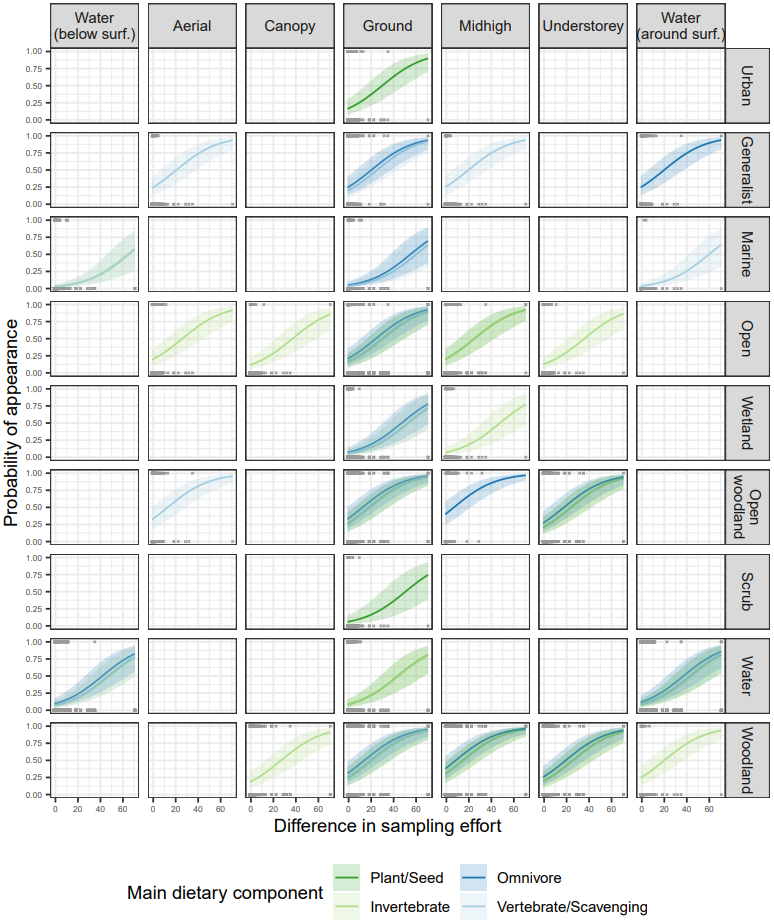


**Figure S.6** Response curves for the predicted probabilities of species appearance. Predicted probabilities of species appearance as a function of the difference in sampling effort between the two time periods. Different colours indicate different main dietary components. Facets indicate different forage strata and habitat associations. Ribbons indicate 0.95 confidence intervals around the predictions. Longevity was held constant at 15 years, the total no. sampling events was fixed at 10 000, and change in Developed area was fixed at the mean area of change observed in the analysed grid cells: 11 964.2 m2. Spatial effects were removed.


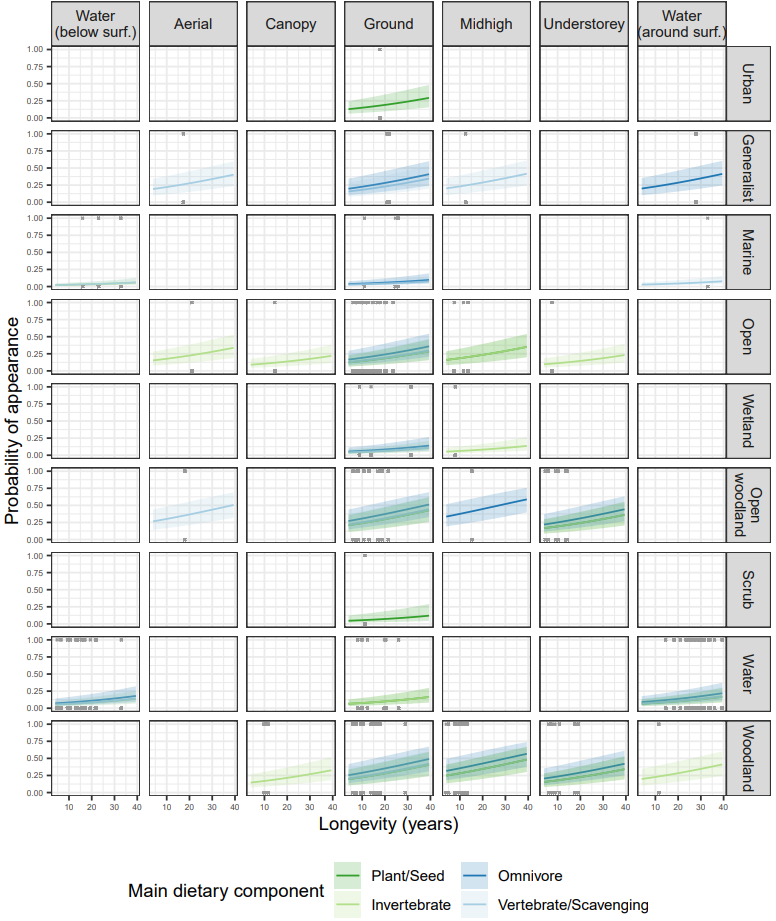


**Figure S.7** Response curves for the predicted probabilities of species appearance. Predicted probabilities of species appearance as a function of longevity. The facets indicate the differences between forage strata and habitat associations. Different colours indicate differences in main dietary components. Ribbons indicate 0.95 confidence intervals around the predictions. Total no. sampling events was fixed at 10 000, difference in sampling effort was fixed at zero, and change in Developed area was fixed at the mean area of change observed in the analysed grid cells: 11 964.2 m2. Spatial effects were removed.

**Table S.3** Intersection analysis of AR5 land-cover and the land-use element of the municipal master plan. Numbers within the matrix describe the area (km2) of each AR5 land-cover category (columns) intersecting with each of the respective planned land-uses (rows), and thus potentially facing land-cover change. Categories assumed to be equivalent are along the diagonal, highlighted in italic.

|  |  | **AR5 land-cover** | | | | |
| --- | --- | --- | --- | --- | --- | --- |
|  |  | **Developed areas** | **Forest, cultivated land, open firm ground, mire** | **Grassland** | **Open firm ground** | **Water** |
| **Planned land-use (municipal master plan)** | **Developed areas** | *46.764* | 6.806 | 0.177 | 4.255 | 0.016 |
| **LNFR** | 8.048 | *237.007* | 5.216 | 0.000 | 1.315 |
| **Green structures** | 1.939 | 9.151 | *0.256* | 0.000 | 0.080 |
| **Open areas** | 1.097 | 1.094 | 0.019 | *1.970* | 0.002 |
| **Water** | 0.034 | 0.397 | 0.002 | 0.000 | *18.959* |

**Table S.4** Model output for the null model of βturnover predicted solely by spatial effects. For the random effects coefficients, ν indicates the “smoothness” parameter, ρ indicates the scale parameter and λ indicates the variance of the random effects.  Units of data used in model construction: meters. Given these parameters, the estimated correlation between data points/locations decreases to <0.1 at a distance of approximately 1 060m; the distance between first-order neighbour centroids is 500m in comparison.

| ***Fixed effects (family = Gaussian)*** | | | |
| --- | --- | --- | --- |
| **Marginal AIC: 1 231.37**  **Conditional AIC: -1 876.18** | **Estimate** | **Cond. S.E.** | **t-value** |
| (Intercept) | 0.319 | 0.120 | 2.665 |
| No. sampling events | -0.000370 | 0.0000531 | -6.970 |
| ***Random effects (family: Gaussian)*** | | | |
| **Correlation parameters** | |  | **Variance parameters** |
| **ν** | **ρ** |  | **λ** |
| 0.102 | 0.0008 |  | 1.636 |
